# Supplementary material for: Experimental challenge with bovine respiratory syncytial virus in dairy calves: bronchial lymph node transcriptome response
Source: PubMed Central journal article supplement (PMC6791843; doi:10.1038/s41598-019-51094-z), 2019-10-14
Supplement: 41598_2019_51094_MOESM1_ESM.pdf [file 41598_2019_51094_MOESM1_ESM.pdf]

# **Experimental challenge with bovine respiratory syncytial virus in dairy calves: bronchial lymph node transcriptome response**

**Dayle Johnston, Bernadette Earley, Matthew S. McCabe, Ken Lemon, Catherine Duffy, Michael McMenemy, S. Louise Cosby, JaeWoo Kim, Gordon Blackshields, Jeremy F. Taylor and Sinead M. Waters**

**Supplementary Figure S1. Scoring of lung lesions.**

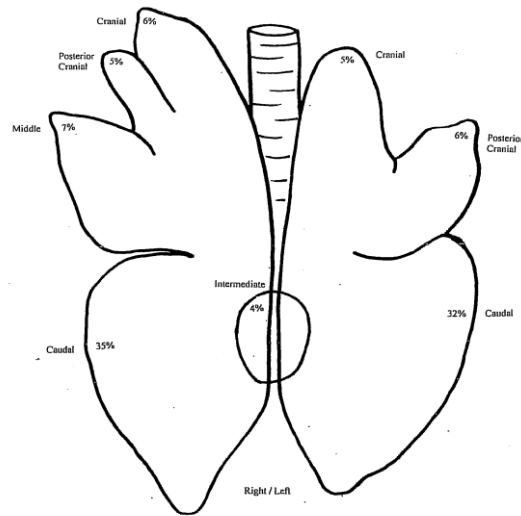

| Lung lobe               | A: Percent area of lobe with lesion | B: Lobe area (% of total)    | (A x B)/100 |
|-------------------------|-------------------------------------|------------------------------|-------------|
| Right Cranial           |                                     | 6                            |             |
| Right Posterior Cranial |                                     | 5                            |             |
| Right Middle            |                                     | 7                            |             |
| Right Caudal            |                                     | 35                           |             |
| Intermediate            |                                     | 4                            |             |
| Left Cranial            |                                     | 5                            |             |
| Left Posterior Cranial  |                                     | 6                            |             |
| Left Caudal             |                                     | 32                           |             |
|                         |                                     | Total lung score out of 100% |             |

Furthermore, the pneumonic lesions will be defined as:

- i. Acute bronchopneumonia
- ii. Subacute fibrinopurulent bronchopneumonia
- iii. Percentage of pneumonic tissue
- iv. Consolidation
- v. Interstitial oedema
- vi. Abscesses
- vii. Necrotic foci
- viii. Haemorrhage
- ix. Other pneumonic lesions (pleuritis and emphysema)

**Supplementary Figure S2.** Haematology counts.

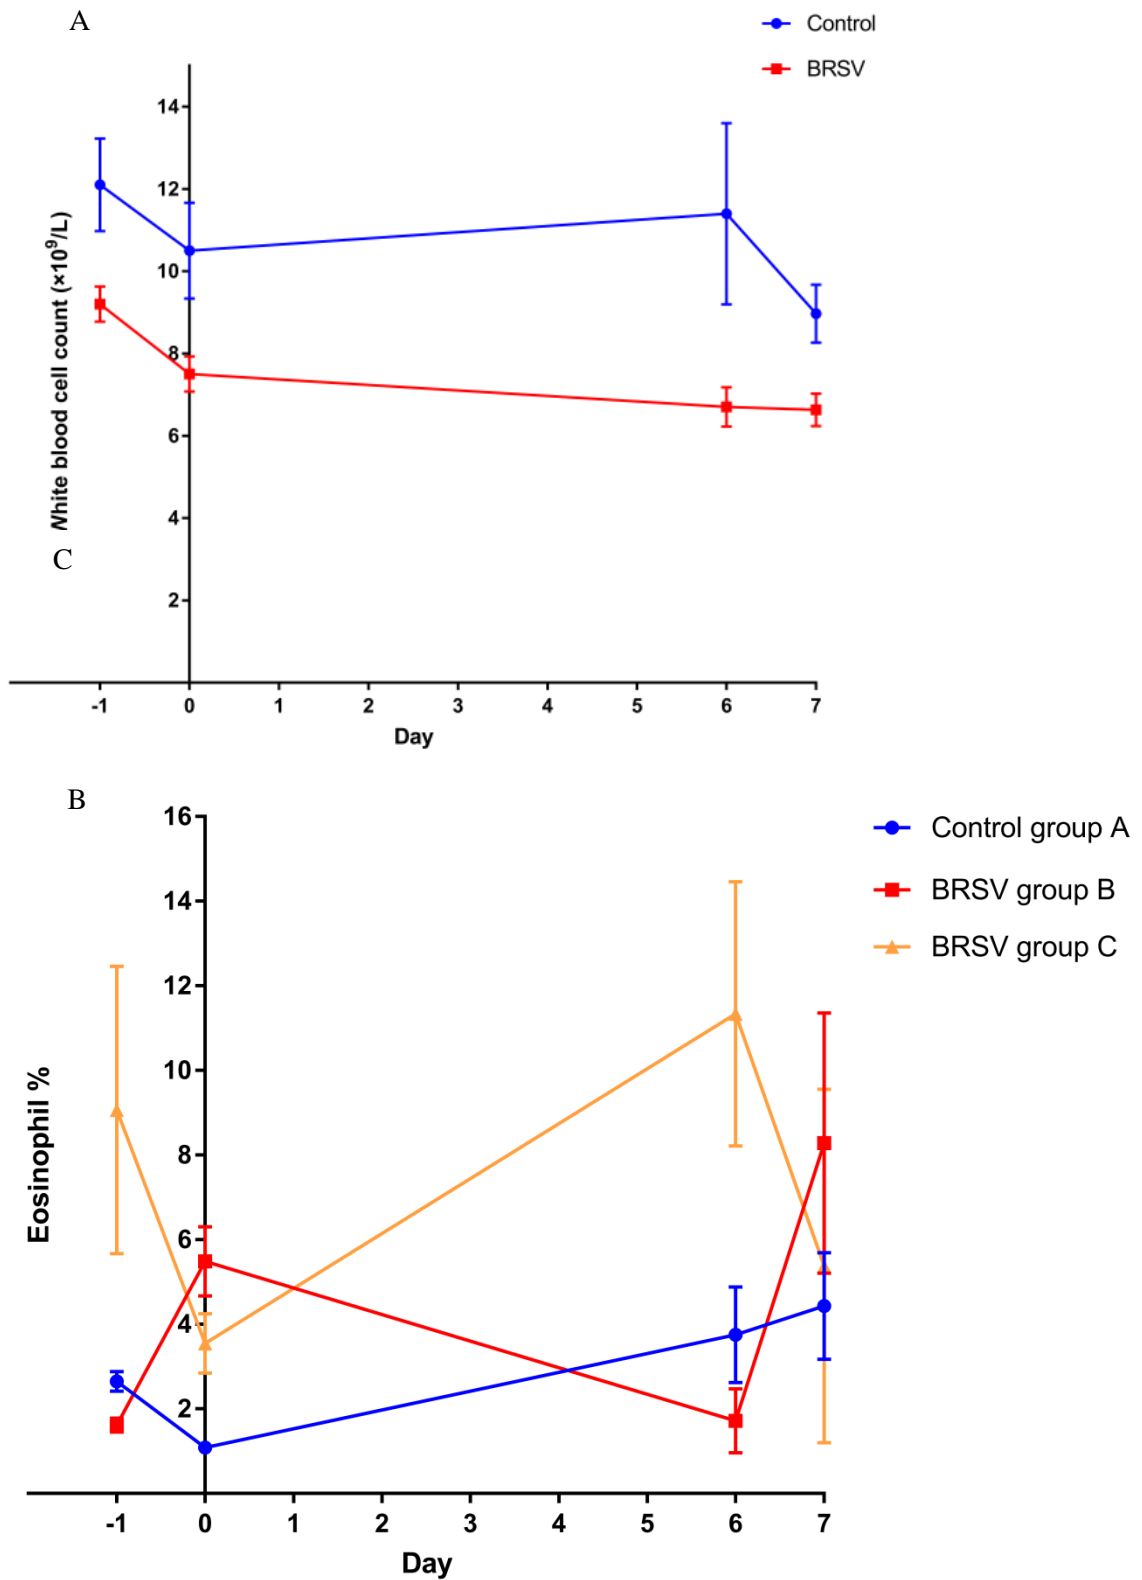

**Supplementary Figure S2.** Haematology cell counts. A) White blood cells ( $\times 10^9/L$ ), and B) Eosinophil (%) in BRSV challenged (groups B and C) and control calves (group A).

**Supplementary Table S1.** Respiratory clinical signs scoring.

| Parameter Evaluated                                       | Score Scale                                                                                                                                                                                                                                                                                                                                                                                                                                                                                                                                                          |
|-----------------------------------------------------------|----------------------------------------------------------------------------------------------------------------------------------------------------------------------------------------------------------------------------------------------------------------------------------------------------------------------------------------------------------------------------------------------------------------------------------------------------------------------------------------------------------------------------------------------------------------------|
| Rectal temperature                                        | (T-39.5°C) X 40                                                                                                                                                                                                                                                                                                                                                                                                                                                                                                                                                      |
| Nasal discharge (each nostril scored separately)          | 5 (serous), 10 (seromuroid), 15 (muroid), 20 (mucopurulent)                                                                                                                                                                                                                                                                                                                                                                                                                                                                                                          |
| Ocular discharge (each eye scored separately)             | 5 (serous), 10 (seromuroid), 15 (muroid), 20 (mucopurulent)                                                                                                                                                                                                                                                                                                                                                                                                                                                                                                          |
| Spontaneous cough 0 (no), 40 (yes)                        | 0 (no), 40 (yes)                                                                                                                                                                                                                                                                                                                                                                                                                                                                                                                                                     |
| Induced cough 0 (no), 40 (yes)                            | 0 (no), 40 (yes)                                                                                                                                                                                                                                                                                                                                                                                                                                                                                                                                                     |
| Respiratory Rate (RR)–breaths/minute                      | RR-40                                                                                                                                                                                                                                                                                                                                                                                                                                                                                                                                                                |
| Subcutaneous emphysema 0 (no), 100 (yes)                  | 0 (no), 100 (yes)                                                                                                                                                                                                                                                                                                                                                                                                                                                                                                                                                    |
| Mandibular lymph nodes 0 (normal), 50 (enlarged)          | 0 (normal), 50 (enlarged)                                                                                                                                                                                                                                                                                                                                                                                                                                                                                                                                            |
| Lung sounds (harsh or quiet; each lung scored separately) | 0 (normal), 15 (mild/moderate), 30 (severe)                                                                                                                                                                                                                                                                                                                                                                                                                                                                                                                          |
| Crackles                                                  | 0 (no), 80 (yes)                                                                                                                                                                                                                                                                                                                                                                                                                                                                                                                                                     |
| Wheezes                                                   | 0 (no), 60 (yes)                                                                                                                                                                                                                                                                                                                                                                                                                                                                                                                                                     |
| Respiratory character                                     | 0 (normal), 30 (shallow or deep)                                                                                                                                                                                                                                                                                                                                                                                                                                                                                                                                     |
| Apneustic breathing                                       | 0 (no), 30 (yes)                                                                                                                                                                                                                                                                                                                                                                                                                                                                                                                                                     |
| Mouth breathing                                           | 0 (no), 50 (yes)                                                                                                                                                                                                                                                                                                                                                                                                                                                                                                                                                     |
| Dyspnea                                                   | 0 (no), 75 (yes)                                                                                                                                                                                                                                                                                                                                                                                                                                                                                                                                                     |
| Expiratory grunt                                          | 0 (no), 60 (yes)                                                                                                                                                                                                                                                                                                                                                                                                                                                                                                                                                     |
| Biphasic expiration                                       | 0 (no), 60 (yes)                                                                                                                                                                                                                                                                                                                                                                                                                                                                                                                                                     |
| General clinical condition                                | 0 ( <b>Normal:</b> Bright, alert, bright eyes, erect ears, attentive, licks nostrils frequently and stays with the group); 30 ( <b>Subdued:</b> Ears drop slightly, licks nostrils occasionally, tries to stay with the group); 70 ( <b>Depressed:</b> Walks slowly, lethargic, stands alone for prolonged periods, sometimes stands with head down); 100 ( <b>Unresponsive:</b> Uninterested in environment, very lethargic, apathetic, stands with head down most of the time, often in sternal decumbency, reluctant to stand up. Euthanasia for ethical reasons. |
